# Supplementary material for: Parabens Permeation through Biological Membranes: A Comparative Study Using Franz Cell Diffusion System and Biomimetic Liquid Chromatography
Source: MDPI journal article supplement (doi:10.3390/molecules27134263), 2022-07-01
Supplement: s1 [file s1]

## Supplementary Materials

### Parabens Permeation through Biological Membranes: A Comparative Study Using Franz Cell Diffusion System and Biomimetic Liquid Chromatography

**Table S1.** Chromatographic Limit of Detection (LOD) of the seven analyzed parabens and their metabolite.

**Table S2.** Phospholipophilicity calculated for both stationary phases ( $\text{clog } k_w^{\text{IAM.MG**}}$ ,  $\text{clog } k_w^{\text{IAM.DD2**}}$ ) in silico.

**Figure S1.** Relationship between calculated phospholipophilicity data.

**Table S1.** Chromatographic Limit of Detection (LOD) of the seven analyzed parabens and their metabolite.

| Compound | LOD $\mu\text{g mL}^{-1}$ |
|----------|---------------------------|
| pHBA     | 0.886                     |
| MP       | <b>0.810</b>              |
| EP       | 0.052                     |
| iPrP     | 0.129                     |
| PrP      | 0.213                     |
| iBuP     | 0.109                     |
| BuP      | 0.312                     |
| BzP      | 0.187                     |

**Table S2.** Phospholipophilicity calculated for both stationary phases ( $\text{clog } k_w^{\text{IAM.MG**}}$ ,  $\text{clog } k_w^{\text{IAM.DD2**}}$ ) in silico, via a user-friendly tool Web service (available at <https://nova.disfarm.unimi.it/vegaol/logkwiam.htm>), able to predict phospholipophilicity of any molecule included in the PubChem collection.

| Compound | $\text{clog } k_w^{\text{IAM.MG}}$ | $\text{clog } k_w^{\text{IAM.DD2}}$ |
|----------|------------------------------------|-------------------------------------|
| pHBA     | 0.277                              | 0.354                               |
| MP       | 0.499                              | 0.737                               |
| EP       | 0.716                              | 1.000                               |
| PrP      | 0.988                              | 1.334                               |
| iPrP     | 0.957                              | 1.314                               |
| BuP      | 1.282                              | 1.698                               |
| iBuP     | 1.216                              | 1.630                               |
| BzP      | 1.611                              | 1.941                               |

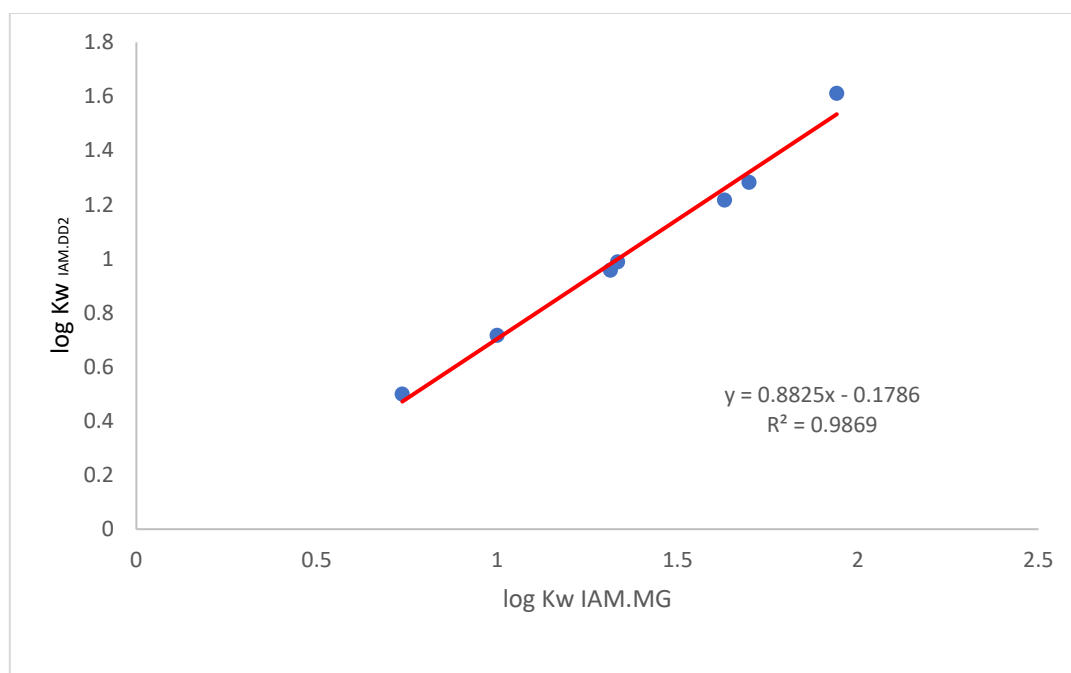

**Figure S1.** Relationship between calculated phospholipophilicity data ( $\log Kw^{IAM.MG}$  and  $\log Kw^{IAM.DD2}$ ) for both stationary phases achieved by Web service (available at <https://nova.disfarm.unimi.it/vegaol/logkwiam.htm>).
